# Supplementary material for: Development of polyacrylic acid-functionalized porous zinc sulfide nanospheres for a non-aqueous solid phase extraction procedure toward alkaloids
Source: Royal Society of Chemistry journal article supplement (doi:10.1039/c5ra02827b), 2015-01-01
Supplement: c5ra02827b1.pdf [file c5ra02827b1.pdf]

## Supplement Information

### Development of polyacrylic acid-functionalized porous zinc sulfide nanospheres for a non-aqueous solid phase extraction procedure toward alkaloids

Dong Zhu,\* Wei Li,\* Hong-Mei Wen, Yue Hu, Jun Wang, Jun-Min Zhu, Wen-Ting Ni and Chao-Qian Gu

School of Pharmacy, Nanjing University of Chinese Medicine, Nanjing 210023, P. R. China

Tel: +86 25 85811839. Fax: +86 25 85811839

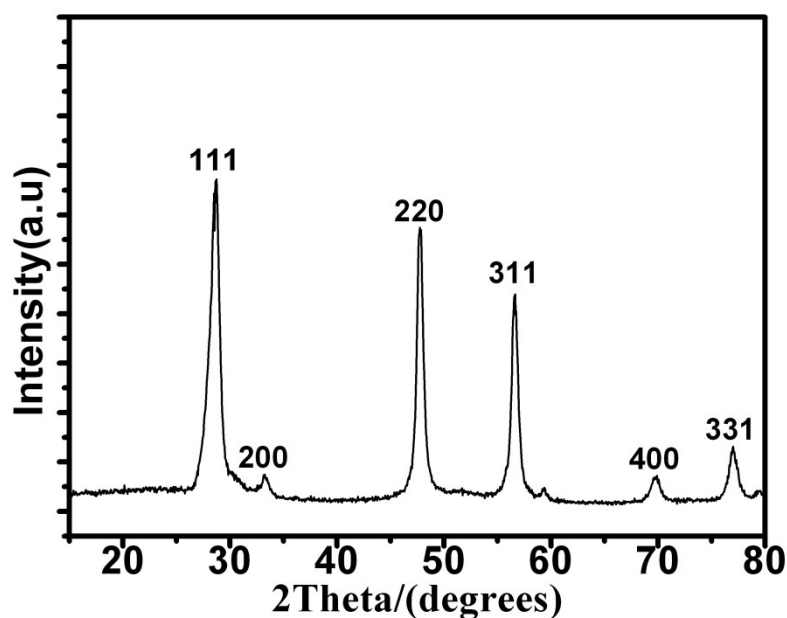

Figure S1 Typical XRD pattern of PZNs.

The Fourier transform infrared (FT-IR) spectra of the PZNs, NH<sub>2</sub>-PZNs and PAA-PZNs were shown in Figure S2. In contrast to that of the as-prepared PZNs, the FT-IR spectrum of amine functionalized PZNs displays a new peak at 3500 cm<sup>-1</sup>, ascribed to the N–H stretching vibration. Moreover, a new peak assigned to N–H asymmetric bending vibration at 1559 cm<sup>-1</sup> and two peaks at 2951 and 2887 cm<sup>-1</sup> assigning to C–H stretching vibrations appeared, which confirmed the successful functionalization of PZNs with amino groups. After grafting with PAA, two new adsorption peaks appeared at 1653 and 1717 cm<sup>-1</sup>, which could be assigned to the C=O stretching vibration in the amide group, and the C=O stretching vibration in the carboxyl group, respectively, which indicated the successful grafting of PAA.

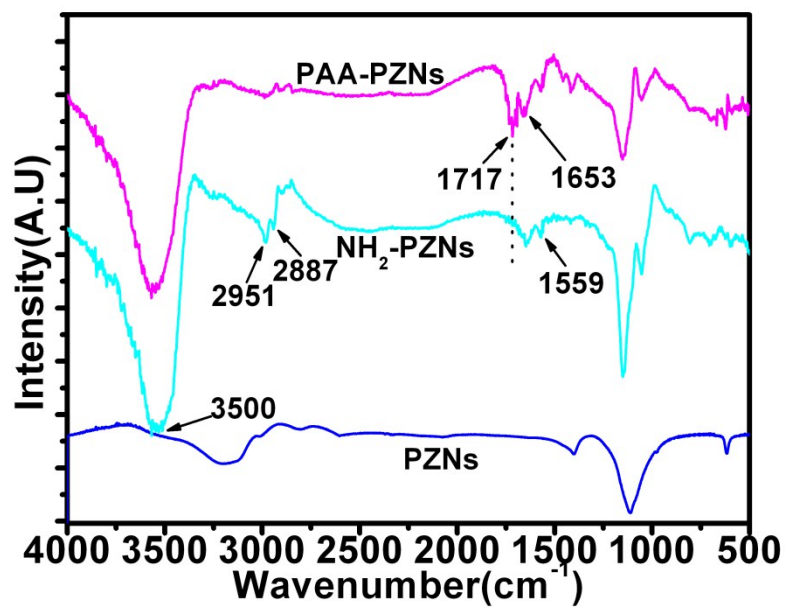

Figure S2. FT-IR spectra of PZNs, NH<sub>2</sub>-PZNs, and PAA-PZNs.
